# Supplementary material for: Nitric Oxide Mediated Transcriptome Profiling Reveals Activation of Multiple Regulatory Pathways in Arabidopsis thaliana
Source: Front Plant Sci. 2016 Jun 29;7:975. doi: 10.3389/fpls.2016.00975 (PMC4926318; doi:10.3389/fpls.2016.00975)
Supplement: Supplementary file 4 [file Table4.XLSX]

## Sheet: Sheet1
Supplementary Table S4. Leaf transcriptome of Arabidopsis infiltrated with 1mM CysNO. List of DEGs involved in Hormone metabolism (Refer to Supplementary Figure S2).
MapMan analysis
Bind Code	Bin Name	ID	Type	Description	Log2(Val_2/Val_1)
IAA (59 genes)
17.2.1	hormone metabolism.auxin.synthesis-degradation	at1g44350	Transcript	Symbols: ILL6 | ILL6; IAA-amino acid conjugate hydrolase/ metallopeptidase | chr1:16834210-16838286 REVERSE	6.61196
17.2.1	hormone metabolism.auxin.synthesis-degradation	at1g51760	Transcript	Symbols: IAR3, JR3 | IAR3 (IAA-ALANINE RESISTANT 3); IAA-Ala conjugate hydrolase/ metallopeptidase | chr1:19199419-19201642 FORWARD	5.5292
17.2.1	hormone metabolism.auxin.synthesis-degradation	at1g51780	Transcript	Symbols: ILL5 | ILL5; IAA-amino acid conjugate hydrolase/ metallopeptidase | chr1:19204512-19206586 FORWARD	10.4158
17.2.1	hormone metabolism.auxin.synthesis-degradation	at3g02875	Transcript	Symbols: ILR1 | ILR1 (IAA-LEUCINE RESISTANT 1); IAA-Leu conjugate hydrolase/ IAA-Phe conjugate hydrolase/ metallopeptidase | chr3:631913-634074 FORWARD	3.51452
17.2.2	hormone metabolism.auxin.signal transduction	at1g12820	Transcript	Symbols: AFB3 | AFB3 (AUXIN SIGNALING F-BOX 3); auxin binding / ubiquitin-protein ligase | chr1:4368760-4371293 REVERSE	-1.15444
17.2.2	hormone metabolism.auxin.signal transduction	at1g23080	Transcript	Symbols: PIN7, ATPIN7 | PIN7 (PIN-FORMED 7); auxin efflux transmembrane transporter/ auxin:hydrogen symporter/ transporter | chr1:8180577-8183570 REVERSE	-4.24387
17.2.2	hormone metabolism.auxin.signal transduction	at1g70940	Transcript	Symbols: PIN3, ATPIN3 | PIN3 (PIN-FORMED 3); auxin:hydrogen symporter/ transporter | chr1:26743054-26746395 FORWARD	-3.27727
17.2.2	hormone metabolism.auxin.signal transduction	at1g73590	Transcript	Symbols: PIN1, ATPIN1 | PIN1 (PIN-FORMED 1); transporter | chr1:27659673-27663178 FORWARD	-1.47612
17.2.2	hormone metabolism.auxin.signal transduction	at1g77690	Transcript	Symbols: LAX3 | LAX3 (LIKE AUX1 3); amino acid transmembrane transporter/ auxin influx transmembrane transporter/ transporter | chr1:29200941-29203340 REVERSE	-2.31844
17.2.2	hormone metabolism.auxin.signal transduction	at2g01420	Transcript	Symbols: PIN4 | PIN4 (PIN-FORMED 4); auxin:hydrogen symporter/ transporter | chr2:180105-183328 REVERSE	-3.468
17.2.2	hormone metabolism.auxin.signal transduction	at2g26170	Transcript	Symbols: CYP711A1, MAX1 | CYP711A1; electron carrier/ heme binding / iron ion binding / monooxygenase/ oxygen binding | chr2:11140809-11143360 FORWARD	-0.96086
17.2.2	hormone metabolism.auxin.signal transduction	at4g02980	Transcript	Symbols: ABP1, ABP | ABP1 (ENDOPLASMIC RETICULUM AUXIN BINDING PROTEIN 1); auxin binding | chr4:1319656-1321477 REVERSE	-1.1741
17.2.2	hormone metabolism.auxin.signal transduction	at5g35570	Transcript	unknown protein | chr5:13749711-13753458 REVERSE	1.0758
17.2.2	hormone metabolism.auxin.signal transduction	at5g55540	Transcript	Symbols: TRN1, LOP1 | TRN1 (TORNADO 1) | chr5:22496196-22500543 REVERSE	-1.50738
17.2.3	hormone metabolism.auxin.induced-regulated-responsive-activated	at1g20470	Transcript	auxin-responsive family protein | chr1:7094260-7094869 FORWARD	-5.05225
17.2.3	hormone metabolism.auxin.induced-regulated-responsive-activated	at1g29500	Transcript	auxin-responsive protein, putative | chr1:10321210-10321864 FORWARD	-3.78099
17.2.3	hormone metabolism.auxin.induced-regulated-responsive-activated	at1g29510	Transcript	Symbols: SAUR68 | SAUR68 (SMALL AUXIN UPREGULATED 68) | chr1:10322574-10323189 FORWARD	-5.09793
17.2.3	hormone metabolism.auxin.induced-regulated-responsive-activated	at1g56150	Transcript	auxin-responsive family protein | chr1:21017385-21017939 FORWARD	-1.83688
17.2.3	hormone metabolism.auxin.induced-regulated-responsive-activated	at1g60730	Transcript	aldo/keto reductase family protein | chr1:22358035-22360158 REVERSE	3.62668
17.2.3	hormone metabolism.auxin.induced-regulated-responsive-activated	at1g72430	Transcript	auxin-responsive protein-related | chr1:27264911-27265630 REVERSE	-1.43393
17.2.3	hormone metabolism.auxin.induced-regulated-responsive-activated	at2g04850	Transcript	auxin-responsive protein-related | chr2:1704283-1705778 FORWARD	-2.48034
17.2.3	hormone metabolism.auxin.induced-regulated-responsive-activated	at2g23170	Transcript	Symbols: GH3.3 | GH3.3; indole-3-acetic acid amido synthetase | chr2:9863855-9866562 REVERSE	4.32522
17.2.3	hormone metabolism.auxin.induced-regulated-responsive-activated	at2g33310	Transcript	Symbols: IAA13 | IAA13; transcription factor | chr2:14114281-14115969 REVERSE	-2.32176
17.2.3	hormone metabolism.auxin.induced-regulated-responsive-activated	at2g33830	Transcript	dormancy/auxin associated family protein | chr2:14309484-14310351 REVERSE	-1.73178
17.2.3	hormone metabolism.auxin.induced-regulated-responsive-activated	at2g37980	Transcript	unknown protein | chr2:15894057-15897610 REVERSE	6.47947
17.2.3	hormone metabolism.auxin.induced-regulated-responsive-activated	at2g45210	Transcript	auxin-responsive protein-related | chr2:18641566-18642704 FORWARD	2.00508
17.2.3	hormone metabolism.auxin.induced-regulated-responsive-activated	at2g46370	Transcript	Symbols: JAR1, FIN219 | JAR1 (JASMONATE RESISTANT 1); ATP binding / adenylyltransferase/ catalytic/ jasmonate-amino synthetase | chr2:19033790-19036659 FORWARD	5.10924
17.2.3	hormone metabolism.auxin.induced-regulated-responsive-activated	at3g03830	Transcript	auxin-responsive protein, putative | chr3:979984-980488 REVERSE	-3.74257
17.2.3	hormone metabolism.auxin.induced-regulated-responsive-activated	at3g03840	Transcript	auxin-responsive protein, putative | chr3:981072-981798 FORWARD	-3.37314
17.2.3	hormone metabolism.auxin.induced-regulated-responsive-activated	at3g03850	Transcript	auxin-responsive protein, putative | chr3:983121-983751 FORWARD	-3.33744
17.2.3	hormone metabolism.auxin.induced-regulated-responsive-activated	at3g07390	Transcript	Symbols: AIR12 | AIR12; extracellular matrix structural constituent | chr3:2365301-2366496 FORWARD	2.58185
17.2.3	hormone metabolism.auxin.induced-regulated-responsive-activated	at3g30300	Transcript	FUNCTIONS IN: molecular_function unknown; INVOLVED IN: biological_process unknown; LOCATED IN: endomembrane system; EXPRESSED IN: 22 plant structures; EXPRESSED DURING: 13 growth stages; CONTAINS InterPro DOMAIN/s: Protein of unknown function DUF246, plant (InterPro:IPR004348); BEST Arabidopsis thaliana protein match is: EDA30 (embryo sac development arrest 30) (TAIR:AT3G03810.1); Has 512 Blast h…	-2.26876
17.2.3	hormone metabolism.auxin.induced-regulated-responsive-activated	at3g54100	Transcript	unknown protein | chr3:20034071-20037953 REVERSE	1.83142
17.2.3	hormone metabolism.auxin.induced-regulated-responsive-activated	at3g60690	Transcript	auxin-responsive family protein | chr3:22435121-22435949 FORWARD	1.23274
17.2.3	hormone metabolism.auxin.induced-regulated-responsive-activated	at3g61750	Transcript	auxin-responsive protein -related | chr3:22857897-22859254 REVERSE	-2.53661
17.2.3	hormone metabolism.auxin.induced-regulated-responsive-activated	at4g03400	Transcript	Symbols: DFL2, GH3-10 | DFL2 (DWARF IN LIGHT 2) | chr4:1497536-1499865 REVERSE	2.37716
17.2.3	hormone metabolism.auxin.induced-regulated-responsive-activated	at4g12410	Transcript	auxin-responsive family protein | chr4:7342956-7343590 REVERSE	5.92123
17.2.3	hormone metabolism.auxin.induced-regulated-responsive-activated	at4g12980	Transcript	auxin-responsive protein, putative | chr4:7589395-7591102 REVERSE	-3.78144
17.2.3	hormone metabolism.auxin.induced-regulated-responsive-activated	at4g22620	Transcript	auxin-responsive family protein | chr4:11907631-11908113 FORWARD	3.38572
17.2.3	hormone metabolism.auxin.induced-regulated-responsive-activated	at4g27260	Transcript	Symbols: GH3.5, WES1 | WES1; indole-3-acetic acid amido synthetase | chr4:13653609-13656204 FORWARD	3.1002
17.2.3	hormone metabolism.auxin.induced-regulated-responsive-activated	at4g27450	Transcript	unknown protein | chr4:13727484-13728886 REVERSE	-1.80236
17.2.3	hormone metabolism.auxin.induced-regulated-responsive-activated	at4g36110	Transcript	auxin-responsive protein, putative | chr4:17089949-17090825 FORWARD	2.1479
17.2.3	hormone metabolism.auxin.induced-regulated-responsive-activated	at4g37390	Transcript	Symbols: YDK1, GH3.2, BRU6, GH3-2, AUR3 | BRU6; indole-3-acetic acid amido synthetase | chr4:17579657-17582022 FORWARD	5.53269
17.2.3	hormone metabolism.auxin.induced-regulated-responsive-activated	at4g38840	Transcript	auxin-responsive protein, putative | chr4:18124978-18125559 REVERSE	-3.53193
17.2.3	hormone metabolism.auxin.induced-regulated-responsive-activated	at4g38850	Transcript	Symbols: SAUR_AC1, ATSAUR15, SAUR15, SAUR-AC1 | SAUR15 (SMALL AUXIN UPREGULATED 15) | chr4:18126171-18126680 FORWARD	-3.30735
17.2.3	hormone metabolism.auxin.induced-regulated-responsive-activated	at4g38860	Transcript	auxin-responsive protein, putative | chr4:18130268-18131060 FORWARD	-5.43081
17.2.3	hormone metabolism.auxin.induced-regulated-responsive-activated	at5g01100	Transcript	unknown protein | chr5:34596-37948 REVERSE	6.9223
17.2.3	hormone metabolism.auxin.induced-regulated-responsive-activated	at5g13370	Transcript	auxin-responsive GH3 family protein | chr5:4286819-4289554 FORWARD	1.49512
17.2.3	hormone metabolism.auxin.induced-regulated-responsive-activated	at5g18010	Transcript	auxin-responsive protein, putative | chr5:5962897-5963405 REVERSE	-3.80197
17.2.3	hormone metabolism.auxin.induced-regulated-responsive-activated	at5g18020	Transcript	auxin-responsive protein, putative | chr5:5966183-5966677 REVERSE	-4.68736
17.2.3	hormone metabolism.auxin.induced-regulated-responsive-activated	at5g18030	Transcript	auxin-responsive protein, putative | chr5:5968435-5968938 FORWARD	-3.968
17.2.3	hormone metabolism.auxin.induced-regulated-responsive-activated	at5g18050	Transcript	auxin-responsive protein, putative | chr5:5974567-5975054 REVERSE	-4.19313
17.2.3	hormone metabolism.auxin.induced-regulated-responsive-activated	at5g18060	Transcript	auxin-responsive protein, putative | chr5:5975954-5976496 FORWARD	-5.20509
17.2.3	hormone metabolism.auxin.induced-regulated-responsive-activated	at5g18080	Transcript	auxin-responsive protein, putative | chr5:5983840-5984112 FORWARD	-4.60198
17.2.3	hormone metabolism.auxin.induced-regulated-responsive-activated	at5g20730	Transcript	Symbols: NPH4, MSG1, IAA21, ARF7, TIR5, BIP | NPH4 (NON-PHOTOTROPHIC HYPOCOTYL); DNA binding / transcription activator/ transcription factor/ transcription regulator | chr5:7016470-7022113 REVERSE	0.93834
17.2.3	hormone metabolism.auxin.induced-regulated-responsive-activated	at5g35735	Transcript	auxin-responsive family protein | chr5:13900752-13902997 REVERSE	5.80403
17.2.3	hormone metabolism.auxin.induced-regulated-responsive-activated	at5g50760	Transcript	auxin-responsive family protein | chr5:20644661-20645469 FORWARD	3.217
17.2.3	hormone metabolism.auxin.induced-regulated-responsive-activated	at5g54510	Transcript	Symbols: GH3.6, DFL1 | DFL1 (DWARF IN LIGHT 1); indole-3-acetic acid amido synthetase | chr5:22131093-22133678 REVERSE	4.36949
17.2.3	hormone metabolism.auxin.induced-regulated-responsive-activated	at5g65470	Transcript	unknown protein | chr5:26172131-26175033 FORWARD	2.31928
ABA (26 genes)
17.1.1	hormone metabolism.abscisic acid.synthesis-degradation	at1g16540	Transcript	Symbols: SIR3, LOS5, ABA3, ATABA3 | ABA3 (ABA DEFICIENT 3); Mo-molybdopterin cofactor sulfurase/ selenocysteine lyase | chr1:5659415-5665449 FORWARD	1.16894
17.1.1	hormone metabolism.abscisic acid.synthesis-degradation	at1g19950	Transcript	Symbols: HVA22H | HVA22H (HVA22-LIKE PROTEIN H (ATHVA22H)) | chr1:6924184-6926724 FORWARD	-3.45939
17.1.1	hormone metabolism.abscisic acid.synthesis-degradation	at3g43600	Transcript	Symbols: AAO2 | AAO2 (ALDEHYDE OXIDASE 2); aldehyde oxidase | chr3:15512607-15517506 REVERSE	-2.29462
17.1.1.1.1	hormone metabolism.abscisic acid.synthesis-degradation.synthesis.zeaxanthin epoxidase	at5g67030	Transcript	Symbols: ABA1, LOS6, NPQ2, ATABA1, ZEP, IBS3, ATZEP | ABA1 (ABA DEFICIENT 1); zeaxanthin epoxidase | chr5:26753510-26757236 REVERSE	-1.31109
17.1.1.1.10	hormone metabolism.abscisic acid.synthesis-degradation.synthesis.9-cis-epoxycarotenoid dioxygenase	at3g14440	Transcript	Symbols: NCED3, ATNCED3, STO1, SIS7 | NCED3 (NINE-CIS-EPOXYCAROTENOID DIOXYGENASE 3); 9-cis-epoxycarotenoid dioxygenase | chr3:4831288-4833599 REVERSE	3.74604
17.1.1.1.10	hormone metabolism.abscisic acid.synthesis-degradation.synthesis.9-cis-epoxycarotenoid dioxygenase	at4g19170	Transcript	Symbols: NCED4 | NCED4 (NINE-CIS-EPOXYCAROTENOID DIOXYGENASE 4) | chr4:10481786-10483857 FORWARD	-2.99975
17.1.1.1.11	hormone metabolism.abscisic acid.synthesis-degradation.synthesis.short chain alcohol dehydrogenmase (ABA2)	at1g52340	Transcript	Symbols: ABA2, SIS4, GIN1, SDR1, ISI4, SRE1, ATABA2, ATSDR1 | ABA2 (ABA DEFICIENT 2); alcohol dehydrogenase/ oxidoreductase/ xanthoxin dehydrogenase | chr1:19489794-19491648 REVERSE	-2.01975
17.1.1.1.12	hormone metabolism.abscisic acid.synthesis-degradation.synthesis.abscisic aldehyde oxidase	at2g27150	Transcript	Symbols: AAO3 | AAO3 (Abscisic ALDEHYDE OXIDASE 3); abscisic aldehyde oxidase/ aldehyde oxidase/ indole-3-acetaldehyde oxidase | chr2:11601754-11607161 FORWARD	1.49737
17.1.1.2.1	hormone metabolism.abscisic acid.synthesis-degradation.degradation.8-hydroxylase	at4g19230	Transcript	Symbols: CYP707A1 | CYP707A1; (+)-abscisic acid 8'-hydroxylase/ oxygen binding | chr4:10521379-10523961 FORWARD	5.07377
17.1.2	hormone metabolism.abscisic acid.signal transduction	at2g30470	Transcript	Symbols: HSI2, VAL1 | HSI2 (HIGH-LEVEL EXPRESSION OF SUGAR-INDUCIBLE GENE 2); transcription factor/ transcription repressor | chr2:12980507-12985043 REVERSE	2.12498
17.1.2	hormone metabolism.abscisic acid.signal transduction	at3g63210	Transcript	Symbols: MARD1 | MARD1 | chr3:23353615-23355160 REVERSE	-2.60799
17.1.2	hormone metabolism.abscisic acid.signal transduction	at4g26080	Transcript	Symbols: ABI1 | ABI1 (ABA INSENSITIVE 1); calcium ion binding / protein serine/threonine phosphatase | chr4:13219961-13222284 REVERSE	2.97667
17.1.2	hormone metabolism.abscisic acid.signal transduction	at5g57050	Transcript	Symbols: ABI2 | ABI2 (ABA INSENSITIVE 2); protein serine/threonine phosphatase | chr5:23087235-23089627 FORWARD	1.64969
17.1.3	hormone metabolism.abscisic acid.induced-regulated-responsive-activated	at1g28200	Transcript	Symbols: FIP1 | FIP1 (FH INTERACTING PROTEIN 1) | chr1:9850147-9852366 REVERSE	1.45695
17.1.3	hormone metabolism.abscisic acid.induced-regulated-responsive-activated	at1g69700	Transcript	Symbols: ATHVA22C | ATHVA22C | chr1:26220238-26221825 FORWARD	-1.57378
17.1.3	hormone metabolism.abscisic acid.induced-regulated-responsive-activated	at1g74520	Transcript	Symbols: ATHVA22A | ATHVA22A | chr1:28007974-28009300 REVERSE	-1.60162
17.1.3	hormone metabolism.abscisic acid.induced-regulated-responsive-activated	at2g22475	Transcript	Symbols: GEM | GEM (GL2-EXPRESSION MODULATOR) | chr2:9541401-9545010 FORWARD	1.95504
17.1.3	hormone metabolism.abscisic acid.induced-regulated-responsive-activated	at2g40170	Transcript	Symbols: ATEM6, GEA6 | GEA6 (LATE EMBRYOGENESIS ABUNDANT 6) | chr2:16779552-16780258 REVERSE	0
17.1.3	hormone metabolism.abscisic acid.induced-regulated-responsive-activated	at2g47770	Transcript	benzodiazepine receptor-related | chr2:19568464-19569507 FORWARD	4.44528
17.1.3	hormone metabolism.abscisic acid.induced-regulated-responsive-activated	at3g02480	Transcript	ABA-responsive protein-related | chr3:512312-513027 FORWARD	4.9673
17.1.3	hormone metabolism.abscisic acid.induced-regulated-responsive-activated	at4g24960	Transcript	Symbols: ATHVA22D, HVA22D | ATHVA22D | chr4:12827937-12829243 FORWARD	3.60266
17.1.3	hormone metabolism.abscisic acid.induced-regulated-responsive-activated	at5g13200	Transcript	GRAM domain-containing protein / ABA-responsive protein-related | chr5:4207004-4208289 FORWARD	4.37957
17.1.3	hormone metabolism.abscisic acid.induced-regulated-responsive-activated	at5g15960	Transcript	Symbols: KIN1 | KIN1 | chr5:5209898-5210727 FORWARD	7.83951
17.1.3	hormone metabolism.abscisic acid.induced-regulated-responsive-activated	at5g23370	Transcript	GRAM domain-containing protein / ABA-responsive protein-related | chr5:7863331-7864271 REVERSE	-2.29632
17.1.3	hormone metabolism.abscisic acid.induced-regulated-responsive-activated	at5g50720	Transcript	Symbols: ATHVA22E, HVA22E | ATHVA22E | chr5:20633193-20634552 REVERSE	3.42145
17.1.3	hormone metabolism.abscisic acid.induced-regulated-responsive-activated	at5g59220	Transcript	protein phosphatase 2C, putative / PP2C, putative | chr5:23894404-23896619 REVERSE	7.0643
Cytokinin (7 genes)
17.4.1	hormone metabolism.cytokinin.synthesis-degradation	at1g22400	Transcript	Symbols: UGT85A1, ATUGT85A1 | UGT85A1; UDP-glycosyltransferase/ cis-zeatin O-beta-D-glucosyltransferase/ glucuronosyltransferase/ trans-zeatin O-beta-D-glucosyltransferase/ transferase, transferring glycosyl groups / transferase, transferring hexosyl groups | chr1:7903660-7906673 REVERSE	5.75644
17.4.1	hormone metabolism.cytokinin.synthesis-degradation	at1g75450	Transcript	Symbols: CKX5, ATCKX5, ATCKX6 | CKX5 (CYTOKININ OXIDASE 5); cytokinin dehydrogenase | chr1:28314458-28318362 REVERSE	3.44626
17.4.1	hormone metabolism.cytokinin.synthesis-degradation	at2g36750	Transcript	Symbols: UGT73C1 | UGT73C1 (UDP-GLUCOSYL TRANSFERASE 73C1); UDP-glucosyltransferase/ UDP-glycosyltransferase/ cis-zeatin O-beta-D-glucosyltransferase/ trans-zeatin O-beta-D-glucosyltransferase/ transferase, transferring glycosyl groups | chr2:15410462-15412038 REVERSE	1.69476
17.4.1	hormone metabolism.cytokinin.synthesis-degradation	at4g29740	Transcript	Symbols: CKX4, ATCKX4 | CKX4 (CYTOKININ OXIDASE 4); amine oxidase/ cytokinin dehydrogenase | chr4:14566265-14569332 FORWARD	5.54126
17.4.1	hormone metabolism.cytokinin.synthesis-degradation	at5g05860	Transcript	Symbols: UGT76C2 | UGT76C2; UDP-glycosyltransferase/ cis-zeatin O-beta-D-glucosyltransferase/ cytokinin 7-beta-glucosyltransferase/ cytokinin 9-beta-glucosyltransferase/ trans-zeatin O-beta-D-glucosyltransferase/ transferase, transferring glycosyl groups | chr5:1765507-1767455 FORWARD	1.68475
17.4.2	hormone metabolism.cytokinin.signal transduction	at2g01830	Transcript	Symbols: WOL, CRE1, WOL1, AHK4, ATCRE1 | WOL (WOODEN LEG); cytokinin receptor/ osmosensor/ phosphoprotein phosphatase/ protein histidine kinase | chr2:362983-368082 REVERSE	1.43384
17.4.2	hormone metabolism.cytokinin.signal transduction	at5g35750	Transcript	Symbols: AHK2 | AHK2 (ARABIDOPSIS HISTIDINE KINASE 2); cytokinin receptor/ osmosensor/ protein histidine kinase | chr5:13911371-13916337 REVERSE	-1.03572
Ethylene (40 genes)
17.5.1	hormone metabolism.ethylene.synthesis-degradation	at1g03400	Transcript	2-oxoglutarate-dependent dioxygenase, putative | chr1:842747-844190 REVERSE	-1.06359
17.5.1	hormone metabolism.ethylene.synthesis-degradation	at1g04350	Transcript	2-oxoglutarate-dependent dioxygenase, putative | chr1:1165165-1166768 FORWARD	-1.48733
17.5.1	hormone metabolism.ethylene.synthesis-degradation	at1g48420	Transcript	Symbols: D-CDES | D-CDES (D-CYSTEINE DESULFHYDRASE); 1-aminocyclopropane-1-carboxylate deaminase/ D-cysteine desulfhydrase/ catalytic | chr1:17896597-17898804 REVERSE	-1.2628
17.5.1	hormone metabolism.ethylene.synthesis-degradation	at2g25450	Transcript	2-oxoglutarate-dependent dioxygenase, putative | chr2:10829916-10831655 REVERSE	1.26219
17.5.1	hormone metabolism.ethylene.synthesis-degradation	at2g30830	Transcript	2-oxoglutarate-dependent dioxygenase, putative | chr2:13132707-13134284 REVERSE	6.42639
17.5.1	hormone metabolism.ethylene.synthesis-degradation	at4g34120	Transcript	Symbols: LEJ1, CDCP1 | LEJ1 (LOSS OF THE TIMING OF ET AND JA BIOSYNTHESIS 1) | chr4:16341009-16343118 FORWARD	2.4843
17.5.1	hormone metabolism.ethylene.synthesis-degradation	at5g59530	Transcript	2-oxoglutarate-dependent dioxygenase, putative | chr5:23994170-23995734 REVERSE	5.64423
17.5.1	hormone metabolism.ethylene.synthesis-degradation	at5g59540	Transcript	oxidoreductase, 2OG-Fe(II) oxygenase family protein | chr5:23996079-23997590 REVERSE	1.04196
17.5.1.1	hormone metabolism.ethylene.synthesis-degradation.1-aminocyclopropane-1-carboxylate synthase	at1g01480	Transcript	Symbols: ACS2, AT-ACC2 | ACS2; 1-aminocyclopropane-1-carboxylate synthase | chr1:175782-178400 FORWARD	8.4514
17.5.1.1	hormone metabolism.ethylene.synthesis-degradation.1-aminocyclopropane-1-carboxylate synthase	at1g62960	Transcript	Symbols: ACS10 | ACS10 (ACC SYNTHASE 10); 1-aminocyclopropane-1-carboxylate synthase/ L-aspartate:2-oxoglutarate aminotransferase/ aromatic-amino-acid:2-oxoglutarate aminotransferase | chr1:23318187-23320316 REVERSE	-2.22045
17.5.1.1	hormone metabolism.ethylene.synthesis-degradation.1-aminocyclopropane-1-carboxylate synthase	at3g49700	Transcript	Symbols: ETO3, ACS9 | ACS9 (1-AMINOCYCLOPROPANE-1-CARBOXYLATE SYNTHASE 9); 1-aminocyclopropane-1-carboxylate synthase | chr3:18434470-18436141 REVERSE	0
17.5.1.1	hormone metabolism.ethylene.synthesis-degradation.1-aminocyclopropane-1-carboxylate synthase	at4g37770	Transcript	Symbols: ACS8 | ACS8; 1-aminocyclopropane-1-carboxylate synthase | chr4:17752084-17754157 FORWARD	6.85328
17.5.1.2	hormone metabolism.ethylene.synthesis-degradation.1-aminocyclopropane-1-carboxylate oxidase	at1g05010	Transcript	Symbols: EFE, ACO4, EAT1 | EFE (ETHYLENE-FORMING ENZYME); 1-aminocyclopropane-1-carboxylate oxidase | chr1:1431190-1432858 REVERSE	2.05683
17.5.1.2	hormone metabolism.ethylene.synthesis-degradation.1-aminocyclopropane-1-carboxylate oxidase	at1g62380	Transcript	Symbols: ACO2, ATACO2 | ACO2 (ACC OXIDASE 2); 1-aminocyclopropane-1-carboxylate oxidase | chr1:23082170-23084253 FORWARD	1.15734
17.5.2	hormone metabolism.ethylene.signal transduction	at1g04310	Transcript	Symbols: ERS2 | ERS2 (ETHYLENE RESPONSE SENSOR 2); ethylene binding / glycogen synthase kinase 3/ protein histidine kinase/ receptor | chr1:1154764-1157711 REVERSE	-1.97437
17.5.2	hormone metabolism.ethylene.signal transduction	at1g28360	Transcript	Symbols: ERF12, ATERF12 | ERF12 (ERF DOMAIN PROTEIN 12); DNA binding / transcription factor/ transcription repressor | chr1:9951848-9952740 FORWARD	3.25619
17.5.2	hormone metabolism.ethylene.signal transduction	at1g28370	Transcript	Symbols: ERF11, ATERF11 | ERF11 (ERF DOMAIN PROTEIN 11); DNA binding / transcription factor/ transcription repressor | chr1:9955969-9956940 REVERSE	2.88027
17.5.2	hormone metabolism.ethylene.signal transduction	at1g50640	Transcript	Symbols: ERF3, ATERF3 | ERF3 (ETHYLENE RESPONSIVE ELEMENT BINDING FACTOR 3); DNA binding / protein binding / transcription factor/ transcription repressor | chr1:18757148-18758433 REVERSE	1.50325
17.5.2	hormone metabolism.ethylene.signal transduction	at2g31230	Transcript	Symbols: ATERF15 | ATERF15 (Ethylene-responsive element binding factor 15); DNA binding / transcription activator/ transcription factor | chr2:13306593-13307475 REVERSE	-1.28215
17.5.2	hormone metabolism.ethylene.signal transduction	at2g44840	Transcript	Symbols: ATERF13, EREBP, ERF13 | ERF13 (ETHYLENE-RESPONSIVE ELEMENT BINDING FACTOR 13); DNA binding / transcription factor | chr2:18495341-18496272 FORWARD	4.9245
17.5.2	hormone metabolism.ethylene.signal transduction	at3g15210	Transcript	Symbols: ATERF-4, ERF4, RAP2.5, ATERF4 | ERF4 (ETHYLENE RESPONSIVE ELEMENT BINDING FACTOR 4); DNA binding / protein binding / transcription factor/ transcription repressor | chr3:5121422-5122562 FORWARD	2.62035
17.5.2	hormone metabolism.ethylene.signal transduction	at3g20310	Transcript	Symbols: ATERF-7, ATERF7, ERF7 | ERF7 (ETHYLINE RESPONSE FACTOR 7); DNA binding / protein binding / transcription factor/ transcription repressor | chr3:7084806-7086805 REVERSE	1.43645
17.5.2	hormone metabolism.ethylene.signal transduction	at3g23220	Transcript	DNA binding / transcription factor | chr3:8287950-8288388 FORWARD	0
17.5.2	hormone metabolism.ethylene.signal transduction	at3g23230	Transcript	ethylene-responsive factor, putative | chr3:8289647-8290066 REVERSE	5.60904
17.5.2	hormone metabolism.ethylene.signal transduction	at3g23240	Transcript	Symbols: ERF1, ATERF1 | ERF1 (ETHYLENE RESPONSE FACTOR 1); DNA binding / transcription activator/ transcription factor | chr3:8295644-8296604 FORWARD	2.77787
17.5.2	hormone metabolism.ethylene.signal transduction	at3g50260	Transcript	Symbols: CEJ1, ATERF#011 | CEJ1 (COOPERATIVELY REGULATED BY ETHYLENE AND JASMONATE 1); DNA binding / transcription factor | chr3:18634576-18635398 FORWARD	7.04121
17.5.2	hormone metabolism.ethylene.signal transduction	at4g17490	Transcript	Symbols: ATERF6, ERF-6-6 | ATERF6 (ETHYLENE RESPONSIVE ELEMENT BINDING FACTOR 6); DNA binding / transcription factor | chr4:9752824-9753867 REVERSE	1.57769
17.5.2	hormone metabolism.ethylene.signal transduction	at4g17500	Transcript	Symbols: ATERF-1 | ATERF-1 (ETHYLENE RESPONSIVE ELEMENT BINDING FACTOR 1); DNA binding / transcription activator/ transcription factor | chr4:9759325-9760340 FORWARD	0.96437
17.5.2	hormone metabolism.ethylene.signal transduction	at4g34410	Transcript	Symbols: RRTF1 | RRTF1 ({REDOX RESPONSIVE TRANSCRIPTION FACTOR 1); DNA binding / transcription factor | chr4:16451876-16453260 FORWARD	3.90664
17.5.2	hormone metabolism.ethylene.signal transduction	at4g37580	Transcript	Symbols: HLS1, COP3, UNS2 | HLS1 (HOOKLESS 1); N-acetyltransferase | chr4:17658612-17660878 FORWARD	-2.47762
17.5.2	hormone metabolism.ethylene.signal transduction	at5g07580	Transcript	DNA binding / transcription factor | chr5:2399504-2400601 FORWARD	-2.17903
17.5.2	hormone metabolism.ethylene.signal transduction	at5g25190	Transcript	ethylene-responsive element-binding protein, putative | chr5:8706790-8707748 REVERSE	-3.33338
17.5.2	hormone metabolism.ethylene.signal transduction	at5g44210	Transcript	Symbols: ERF9, ATERF9, ATERF-9 | ERF9 (ERF DOMAIN PROTEIN 9); DNA binding / transcription factor/ transcription repressor | chr5:17806472-17807534 FORWARD	4.38827
17.5.2	hormone metabolism.ethylene.signal transduction	at5g47220	Transcript	Symbols: ATERF2, ATERF-2, ERF2 | ERF2 (ETHYLENE RESPONSIVE ELEMENT BINDING FACTOR 2); DNA binding / transcription activator/ transcription factor | chr5:19171862-19172823 REVERSE	1.18124
17.5.2	hormone metabolism.ethylene.signal transduction	at5g51190	Transcript	AP2 domain-containing transcription factor, putative | chr5:20800584-20801416 REVERSE	-3.08383
17.5.2	hormone metabolism.ethylene.signal transduction	at5g61600	Transcript	Symbols: ERF104 | ethylene-responsive element-binding family protein | chr5:24766386-24767430 REVERSE	-1.85924
17.5.3	hormone metabolism.ethylene.induced-regulated-responsive-activated	at1g05710	Transcript	ethylene-responsive protein, putative | chr1:1714950-1717270 FORWARD	2.3146
17.5.3	hormone metabolism.ethylene.induced-regulated-responsive-activated	at2g20100	Transcript	ethylene-responsive family protein | chr2:8678078-8682086 FORWARD	-2.25425
17.5.3	hormone metabolism.ethylene.induced-regulated-responsive-activated	at2g31730	Transcript	ethylene-responsive protein, putative | chr2:13487568-13489679 REVERSE	1.66445
17.5.3	hormone metabolism.ethylene.induced-regulated-responsive-activated	at3g62550	Transcript	universal stress protein (USP) family protein | chr3:23135984-23137173 FORWARD	-2.50418
GA (14 genes)
17.6.1	hormone metabolism.gibberelin.synthesis-degradation	at4g03060	Transcript	Symbols: AOP2 | AOP2 (ALKENYL HYDROXALKYL PRODUCING 2); oxidoreductase, acting on paired donors, with incorporation or reduction of molecular oxygen, 2-oxoglutarate as one donor, and incorporation of one atom each of oxygen into both donors | chr4:1351980-1353854 REVERSE	-2.32669
17.6.1.4	hormone metabolism.gibberelin.synthesis-degradation.ent-kaurenoic acid hydroxylase/oxygenase	at1g05160	Transcript	Symbols: CYP88A3, ATKAO1, KAO1 | CYP88A3 (CYTOCHROME P450 88 A3); ent-kaurenoate oxidase/ oxygen binding | chr1:1487378-1490947 REVERSE	-1.33705
17.6.1.11	hormone metabolism.gibberelin.synthesis-degradation.GA20 oxidase	at4g25420	Transcript	Symbols: GA5, GA20OX1, AT2301, ATGA20OX1 | GA20OX1; gibberellin 20-oxidase | chr4:12990884-12992458 REVERSE	-5.00609
17.6.1.12	hormone metabolism.gibberelin.synthesis-degradation.GA3 oxidase	at1g15550	Transcript	Symbols: GA4, ATGA3OX1, GA3OX1 | GA3OX1 (GIBBERELLIN 3-OXIDASE 1); gibberellin 3-beta-dioxygenase/ transcription factor binding | chr1:5344478-5346166 REVERSE	-2.53326
17.6.1.13	hormone metabolism.gibberelin.synthesis-degradation.GA2 oxidase	at1g02400	Transcript	Symbols: ATGA2OX4, ATGA2OX6, DTA1, GA2OX6 | GA2OX6 (GIBBERELLIN 2-OXIDASE 6); gibberellin 2-beta-dioxygenase | chr1:486801-489577 FORWARD	8.29387
17.6.1.13	hormone metabolism.gibberelin.synthesis-degradation.GA2 oxidase	at1g30040	Transcript	Symbols: ATGA2OX2 | ATGA2OX2 (GIBBERELLIN 2-OXIDASE); gibberellin 2-beta-dioxygenase | chr1:10537648-10539831 FORWARD	3.61653
17.6.2	hormone metabolism.gibberelin.signal transduction	at2g01570	Transcript	Symbols: RGA1, RGA | RGA1 (REPRESSOR OF GA1-3 1); protein binding / transcription factor | chr2:255249-257550 REVERSE	-1.46383
17.6.2	hormone metabolism.gibberelin.signal transduction	at3g63010	Transcript	Symbols: ATGID1B, GID1B | GID1B (GA INSENSITIVE DWARF1B); hydrolase | chr3:23289425-23291486 FORWARD	3.86259
17.6.2	hormone metabolism.gibberelin.signal transduction	at5g27320	Transcript	Symbols: ATGID1C, GID1C | GID1C (GA INSENSITIVE DWARF1C); hydrolase | chr5:9629087-9631210 FORWARD	-1.37505
17.6.2	hormone metabolism.gibberelin.signal transduction	at5g37490	Transcript	U-box domain-containing protein | chr5:14887478-14889151 FORWARD	4.00996
17.6.3	hormone metabolism.gibberelin.induced-regulated-responsive-activated	at1g14920	Transcript	Symbols: GAI, RGA2 | GAI (GIBBERELLIC ACID INSENSITIVE); transcription factor | chr1:5149226-5151354 FORWARD	-1.34752
17.6.3	hormone metabolism.gibberelin.induced-regulated-responsive-activated	at1g74670	Transcript	gibberellin-responsive protein, putative | chr1:28053286-28054149 FORWARD	-3.64709
17.6.3	hormone metabolism.gibberelin.induced-regulated-responsive-activated	at1g75750	Transcript	Symbols: GASA1 | GASA1 (GAST1 PROTEIN HOMOLOG 1) | chr1:28441526-28442367 REVERSE	1.00942
17.6.3	hormone metabolism.gibberelin.induced-regulated-responsive-activated	at5g11740	Transcript	Symbols: AGP15, ATAGP15 | AGP15 (ARABINOGALACTAN PROTEIN 15) | chr5:3784251-3784792 FORWARD	3.27448
Jasmonate (19 genes)
17.7.1	hormone metabolism.jasmonate.synthesis-degradation	at4g34120	Transcript	Symbols: LEJ1, CDCP1 | LEJ1 (LOSS OF THE TIMING OF ET AND JA BIOSYNTHESIS 1) | chr4:16341009-16343118 FORWARD	2.4843
17.7.1.1	hormone metabolism.jasmonate.synthesis-degradation.lipases	at2g44810	Transcript	Symbols: DAD1 | DAD1 (DEFECTIVE ANTHER DEHISCENCE 1); phospholipase A1/ triacylglycerol lipase | chr2:18479053-18480197 FORWARD	10.2467
17.7.1.2	hormone metabolism.jasmonate.synthesis-degradation.lipoxygenase	at1g17420	Transcript	Symbols: LOX3 | LOX3; electron carrier/ iron ion binding / lipoxygenase/ metal ion binding / oxidoreductase, acting on single donors with incorporation of molecular oxygen, incorporation of two atoms of oxygen | chr1:5977411-5981480 FORWARD	7.49653
17.7.1.2	hormone metabolism.jasmonate.synthesis-degradation.lipoxygenase	at1g55020	Transcript	Symbols: LOX1 | LOX1; lipoxygenase | chr1:20525708-20530273 FORWARD	-1.22407
17.7.1.2	hormone metabolism.jasmonate.synthesis-degradation.lipoxygenase	at1g67560	Transcript	lipoxygenase family protein | chr1:25319899-25324264 FORWARD	0.96756
17.7.1.2	hormone metabolism.jasmonate.synthesis-degradation.lipoxygenase	at1g72520	Transcript	lipoxygenase, putative | chr1:27308515-27312754 FORWARD	6.47698
17.7.1.3	hormone metabolism.jasmonate.synthesis-degradation.allene oxidase synthase	at5g42650	Transcript	Symbols: AOS, CYP74A, DDE2 | AOS (ALLENE OXIDE SYNTHASE); allene oxide synthase/ hydro-lyase/ oxygen binding | chr5:17097595-17099395 REVERSE	4.28237
17.7.1.4	hormone metabolism.jasmonate.synthesis-degradation.allene oxidase cyclase	at3g25770	Transcript	Symbols: AOC2 | AOC2 (ALLENE OXIDE CYCLASE 2); allene-oxide cyclase | chr3:9406873-9407955 FORWARD	5.19343
17.7.1.4	hormone metabolism.jasmonate.synthesis-degradation.allene oxidase cyclase	at3g25780	Transcript	Symbols: AOC3 | AOC3 (ALLENE OXIDE CYCLASE 3); allene-oxide cyclase | chr3:9409290-9410567 FORWARD	7.46935
17.7.1.5	hormone metabolism.jasmonate.synthesis-degradation.12-Oxo-PDA-reductase	at1g76680	Transcript	Symbols: OPR1 | OPR1; 12-oxophytodienoate reductase | chr1:28776861-28778467 FORWARD	4.91709
17.7.1.5	hormone metabolism.jasmonate.synthesis-degradation.12-Oxo-PDA-reductase	at1g76690	Transcript	Symbols: OPR2, ATOPR2 | OPR2 | chr1:28778890-28780483 FORWARD	3.9314
17.7.1.5	hormone metabolism.jasmonate.synthesis-degradation.12-Oxo-PDA-reductase	at2g06050	Transcript	Symbols: OPR3 | OPR3 (OPDA-REDUCTASE 3); 12-oxophytodienoate reductase | chr2:2359115-2362180 REVERSE	6.2232
17.7.1.10	hormone metabolism.jasmonate.synthesis-degradation.jasmonate-O-methyltransferase	at1g19640	Transcript	Symbols: JMT | JMT (JASMONIC ACID CARBOXYL METHYLTRANSFERASE); jasmonate O-methyltransferase | chr1:6788885-6791846 REVERSE	1.84178
17.7.2	hormone metabolism.jasmonate.signal transduction	at1g19180	Transcript	Symbols: JAZ1, TIFY10A | JAZ1 (JASMONATE-ZIM-DOMAIN PROTEIN 1); protein binding | chr1:6622094-6623620 FORWARD	4.58094
17.7.2	hormone metabolism.jasmonate.signal transduction	at3g17860	Transcript	Symbols: JAZ3, JAI3, TIFY6B | JAZ3 (JASMONATE-ZIM-DOMAIN PROTEIN 3) | chr3:6119767-6123019 FORWARD	3.33774
17.7.3	hormone metabolism.jasmonate.induced-regulated-responsive-activated	at3g16430	Transcript	Symbols: JAL31 | JAL31 (JACALIN-RELATED LECTIN 31); copper ion binding | chr3:5581663-5583187 FORWARD	3.22745
17.7.3	hormone metabolism.jasmonate.induced-regulated-responsive-activated	at3g16460	Transcript	jacalin lectin family protein | chr3:5592582-5595710 FORWARD	3.44445
17.7.3	hormone metabolism.jasmonate.induced-regulated-responsive-activated	at3g16470	Transcript	Symbols: JR1 | JR1 | chr3:5595938-5598044 REVERSE	4.54585
17.7.3	hormone metabolism.jasmonate.induced-regulated-responsive-activated	at5g48180	Transcript	Symbols: NSP5 | NSP5 (NITRILE SPECIFIER PROTEIN 5) | chr5:19540937-19542426 REVERSE	1.28141
SA (7 genes)
17.8.1	hormone metabolism.salicylic acid.synthesis-degradation	at1g05670	Transcript	UDP-glucoronosyl/UDP-glucosyl transferase family protein | chr1:1697587-1702720 REVERSE	4.16992
17.8.1	hormone metabolism.salicylic acid.synthesis-degradation	at1g05680	Transcript	UDP-glucoronosyl/UDP-glucosyl transferase family protein | chr1:1703092-1704691 REVERSE	4.64748
17.8.1	hormone metabolism.salicylic acid.synthesis-degradation	at3g21950	Transcript	methyltransferase | chr3:7734396-7736394 FORWARD	-2.40702
17.8.1	hormone metabolism.salicylic acid.synthesis-degradation	at4g36470	Transcript	S-adenosyl-L-methionine:carboxyl methyltransferase family protein | chr4:17215027-17216530 REVERSE	-3.12795
17.8.1	hormone metabolism.salicylic acid.synthesis-degradation	at5g04370	Transcript	Symbols: NAMT1 | NAMT1; S-adenosylmethionine-dependent methyltransferase | chr5:1231697-1234147 FORWARD	3.40418
17.8.1.1.5	hormone metabolism.salicylic acid.synthesis-degradation.synthesis.SA glucosyltransferase ester and ether bond making SGE, SAG	at2g43820	Transcript	Symbols: GT, UGT74F2 | UGT74F2 (UDP-GLUCOSYLTRANSFERASE 74F2); UDP-glucose:4-aminobenzoate acylglucosyltransferase/ UDP-glucosyltransferase/ UDP-glycosyltransferase/ transferase, transferring glycosyl groups / transferase, transferring hexosyl groups | chr2:18152227-18153908 FORWARD	2.6602
17.8.1.1.7	hormone metabolism.salicylic acid.synthesis-degradation.synthesis.methyl-SA methylesterase	at3g11480	Transcript	Symbols: BSMT1, ATBSMT1 | BSMT1; S-adenosylmethionine-dependent methyltransferase | chr3:3614437-3617314 FORWARD	9.7686
ABA metabolism (6 genes)
17.1.1.1.1	hormone metabolism.abscisic acid.synthesis-degradation.synthesis.zeaxanthin epoxidase	at5g67030	Transcript	Symbols: ABA1, LOS6, NPQ2, ATABA1, ZEP, IBS3, ATZEP | ABA1 (ABA DEFICIENT 1); zeaxanthin epoxidase | chr5:26753510-26757236 REVERSE	-1.31109
17.1.1.1.10	hormone metabolism.abscisic acid.synthesis-degradation.synthesis.9-cis-epoxycarotenoid dioxygenase	at3g14440	Transcript	Symbols: NCED3, ATNCED3, STO1, SIS7 | NCED3 (NINE-CIS-EPOXYCAROTENOID DIOXYGENASE 3); 9-cis-epoxycarotenoid dioxygenase | chr3:4831288-4833599 REVERSE	3.74604
17.1.1.1.10	hormone metabolism.abscisic acid.synthesis-degradation.synthesis.9-cis-epoxycarotenoid dioxygenase	at4g19170	Transcript	Symbols: NCED4 | NCED4 (NINE-CIS-EPOXYCAROTENOID DIOXYGENASE 4) | chr4:10481786-10483857 FORWARD	-2.99975
17.1.1.1.11	hormone metabolism.abscisic acid.synthesis-degradation.synthesis.short chain alcohol dehydrogenmase (ABA2)	at1g52340	Transcript	Symbols: ABA2, SIS4, GIN1, SDR1, ISI4, SRE1, ATABA2, ATSDR1 | ABA2 (ABA DEFICIENT 2); alcohol dehydrogenase/ oxidoreductase/ xanthoxin dehydrogenase | chr1:19489794-19491648 REVERSE	-2.01975
17.1.1.1.12	hormone metabolism.abscisic acid.synthesis-degradation.synthesis.abscisic aldehyde oxidase	at2g27150	Transcript	Symbols: AAO3 | AAO3 (Abscisic ALDEHYDE OXIDASE 3); abscisic aldehyde oxidase/ aldehyde oxidase/ indole-3-acetaldehyde oxidase | chr2:11601754-11607161 FORWARD	1.49737
17.1.1.2.1	hormone metabolism.abscisic acid.synthesis-degradation.degradation.8-hydroxylase	at4g19230	Transcript	Symbols: CYP707A1 | CYP707A1; (+)-abscisic acid 8'-hydroxylase/ oxygen binding | chr4:10521379-10523961 FORWARD	5.07377
GA metabolism (6 genes)
17.6.1.4	hormone metabolism.gibberelin.synthesis-degradation.ent-kaurenoic acid hydroxylase/oxygenase	at1g05160	Transcript	Symbols: CYP88A3, ATKAO1, KAO1 | CYP88A3 (CYTOCHROME P450 88 A3); ent-kaurenoate oxidase/ oxygen binding | chr1:1487378-1490947 REVERSE	-1.33705
17.6.1.4	hormone metabolism.gibberelin.synthesis-degradation.ent-kaurenoic acid hydroxylase/oxygenase	at1g05160	Transcript	Symbols: CYP88A3, ATKAO1, KAO1 | CYP88A3 (CYTOCHROME P450 88 A3); ent-kaurenoate oxidase/ oxygen binding | chr1:1487378-1490947 REVERSE	-1.33705
17.6.1.11	hormone metabolism.gibberelin.synthesis-degradation.GA20 oxidase	at4g25420	Transcript	Symbols: GA5, GA20OX1, AT2301, ATGA20OX1 | GA20OX1; gibberellin 20-oxidase | chr4:12990884-12992458 REVERSE	-5.00609
17.6.1.12	hormone metabolism.gibberelin.synthesis-degradation.GA3 oxidase	at1g15550	Transcript	Symbols: GA4, ATGA3OX1, GA3OX1 | GA3OX1 (GIBBERELLIN 3-OXIDASE 1); gibberellin 3-beta-dioxygenase/ transcription factor binding | chr1:5344478-5346166 REVERSE	-2.53326
17.6.1.13	hormone metabolism.gibberelin.synthesis-degradation.GA2 oxidase	at1g02400	Transcript	Symbols: ATGA2OX4, ATGA2OX6, DTA1, GA2OX6 | GA2OX6 (GIBBERELLIN 2-OXIDASE 6); gibberellin 2-beta-dioxygenase | chr1:486801-489577 FORWARD	8.29387
17.6.1.13	hormone metabolism.gibberelin.synthesis-degradation.GA2 oxidase	at1g30040	Transcript	Symbols: ATGA2OX2 | ATGA2OX2 (GIBBERELLIN 2-OXIDASE); gibberellin 2-beta-dioxygenase | chr1:10537648-10539831 FORWARD	3.61653
SA metabolism (4 genes)
18.5.2.1	Co-factor and vitamine metabolism.folate & vitamine K.vitamine K.isochorismate synthase	at1g18870	Transcript	Symbols: ICS2 | ICS2 (ISOCHORISMATE SYNTHASE 2); isochorismate synthase | chr1:6515429-6519282 FORWARD	2.62537
18.5.2.1	Co-factor and vitamine metabolism.folate & vitamine K.vitamine K.isochorismate synthase	at1g74710	Transcript	Symbols: EDS16, ICS1, SID2 | isochorismate synthase 1 (ICS1) / isochorismate mutase | chr1:28070296-28074118 FORWARD	1.20965
17.8.1.1.7	hormone metabolism.salicylic acid.synthesis-degradation.synthesis.methyl-SA methylesterase	at3g11480	Transcript	Symbols: BSMT1, ATBSMT1 | BSMT1; S-adenosylmethionine-dependent methyltransferase | chr3:3614437-3617314 FORWARD	9.7686
17.8.1.1.5	hormone metabolism.salicylic acid.synthesis-degradation.synthesis.SA glucosyltransferase ester and ether bond making SGE, SAG	at2g43820	Transcript	Symbols: GT, UGT74F2 | UGT74F2 (UDP-GLUCOSYLTRANSFERASE 74F2); UDP-glucose:4-aminobenzoate acylglucosyltransferase/ UDP-glucosyltransferase/ UDP-glycosyltransferase/ transferase, transferring glycosyl groups / transferase, transferring hexosyl groups | chr2:18152227-18153908 FORWARD	2.6602
JA metabolism (11 genes)
17.7.1.1	hormone metabolism.jasmonate.synthesis-degradation.lipases	at2g44810	Transcript	Symbols: DAD1 | DAD1 (DEFECTIVE ANTHER DEHISCENCE 1); phospholipase A1/ triacylglycerol lipase | chr2:18479053-18480197 FORWARD	10.2467
17.7.1.2	hormone metabolism.jasmonate.synthesis-degradation.lipoxygenase	at1g17420	Transcript	Symbols: LOX3 | LOX3; electron carrier/ iron ion binding / lipoxygenase/ metal ion binding / oxidoreductase, acting on single donors with incorporation of molecular oxygen, incorporation of two atoms of oxygen | chr1:5977411-5981480 FORWARD	7.49653
17.7.1.2	hormone metabolism.jasmonate.synthesis-degradation.lipoxygenase	at1g55020	Transcript	Symbols: LOX1 | LOX1; lipoxygenase | chr1:20525708-20530273 FORWARD	-1.22407
17.7.1.2	hormone metabolism.jasmonate.synthesis-degradation.lipoxygenase	at1g67560	Transcript	lipoxygenase family protein | chr1:25319899-25324264 FORWARD	0.96756
17.7.1.2	hormone metabolism.jasmonate.synthesis-degradation.lipoxygenase	at1g72520	Transcript	lipoxygenase, putative | chr1:27308515-27312754 FORWARD	6.47698
17.7.1.3	hormone metabolism.jasmonate.synthesis-degradation.allene oxidase synthase	at5g42650	Transcript	Symbols: AOS, CYP74A, DDE2 | AOS (ALLENE OXIDE SYNTHASE); allene oxide synthase/ hydro-lyase/ oxygen binding | chr5:17097595-17099395 REVERSE	4.28237
17.7.1.4	hormone metabolism.jasmonate.synthesis-degradation.allene oxidase cyclase	at3g25770	Transcript	Symbols: AOC2 | AOC2 (ALLENE OXIDE CYCLASE 2); allene-oxide cyclase | chr3:9406873-9407955 FORWARD	5.19343
17.7.1.4	hormone metabolism.jasmonate.synthesis-degradation.allene oxidase cyclase	at3g25780	Transcript	Symbols: AOC3 | AOC3 (ALLENE OXIDE CYCLASE 3); allene-oxide cyclase | chr3:9409290-9410567 FORWARD	7.46935
17.7.1.5	hormone metabolism.jasmonate.synthesis-degradation.12-Oxo-PDA-reductase	at1g76680	Transcript	Symbols: OPR1 | OPR1; 12-oxophytodienoate reductase | chr1:28776861-28778467 FORWARD	4.91709
17.7.1.5	hormone metabolism.jasmonate.synthesis-degradation.12-Oxo-PDA-reductase	at1g76690	Transcript	Symbols: OPR2, ATOPR2 | OPR2 | chr1:28778890-28780483 FORWARD	3.9314
17.7.1.5	hormone metabolism.jasmonate.synthesis-degradation.12-Oxo-PDA-reductase	at2g06050	Transcript	Symbols: OPR3 | OPR3 (OPDA-REDUCTASE 3); 12-oxophytodienoate reductase | chr2:2359115-2362180 REVERSE	6.2232
